# Supplementary material
Source: MDPI journal article supplement (https://www.mdpi.com/2077-0472/12/1/1)
Supplement: s1 [file s1]

# Understanding arbuscular mycorrhizal colonization in walnut plantations: The contribution of cover crops and soil microbial communities

Babacar Thioye <sup>1,2\*</sup>, Marc Legras <sup>1,2</sup>, Lisa Castel <sup>1,2</sup>, François Hirissou <sup>3</sup>, Naouel Chaftar <sup>1,2</sup> and Isabelle Trinsoutrot-Gattin <sup>1,2</sup>

<sup>1</sup> UniLaSalle, AGHYLE Research Unit UP 2018.C101, 3 Rue du Tronquet, F-76134 Mont-Saint-Aignan, France; marc.legras@unilasalle.fr (M.L.); Lisa.CASTEL@unilasalle.fr (L.C.); nawelchaftar@yahoo.fr (N.C.); isabelle.gattin@unilasalle.fr (I.T.-G.)

<sup>2</sup> Research Federations NORVEGE Fed4277, Normandy University, F-76821 Mont-Saint-Aignan, France

<sup>3</sup> Chamber of Agriculture Dordogne, 24200, Sarlat, France; francois.hirissou@dordogne.chambagri.fr

\* Correspondence: babacar.thioye@unilasalle.fr; Tel.: +33-778321611

**Table S1** Geographical locations and characteristics of walnut trees plantations

| Modalities                                           | Commune                       | Latitude    | Longitude  | Characteristics                                              |
|------------------------------------------------------|-------------------------------|-------------|------------|--------------------------------------------------------------|
| <b>Conventional walnut trees without cover crops</b> | Baladou (46600)               | 44°55'18" N | 1°32'26" E | Natural grass cover; mineral fertilizers; herbicides         |
|                                                      | Mayrac (46200)                | 44°54'25" N | 1°32'41" E |                                                              |
|                                                      | Mayrac (46200)                | 44°54'25" N | 1°32'41" E |                                                              |
| <b>Conventional walnut trees with cover crops</b>    | Bretenoux (46130)             | 44°54'35" N | 1°51'42" E | Faba bean; oat; mineral fertilizers; herbicides              |
|                                                      |                               | 44°54'35" N | 1°51'42" E |                                                              |
|                                                      | Bretenoux (46130)             |             |            |                                                              |
|                                                      | Saint-Jean-Lespinasse (46400) | 44°52'54" N | 1°51'53" E |                                                              |
| <b>Organic walnut trees without cover crops</b>      | Branceilles (19500)           | 45°00'36" N | 1°41'50" E | Natural grass cover; organic fertilizers; mechanical weeding |
|                                                      | Salignac Eyvigues (24590)     | 44°57'46" N | 1°20'13" E |                                                              |
|                                                      |                               | 44°57'46" N | 1°20'13" E |                                                              |
|                                                      | Salignac Eyvigues (24590)     |             |            |                                                              |
| <b>Organic walnut trees with cover crops</b>         | Martel (46600)                | 44°57'14" N | 1°37'45" E | Faba bean; organic fertilizers;                              |
|                                                      | Martel (46600)                | 44°57'14" N | 1°37'45" E |                                                              |

|                            |            |            |                       |
|----------------------------|------------|------------|-----------------------|
| SM-De-Bannieres<br>(46600) | 44°59'5" N | 1°41'28" E | mechanical<br>weeding |
|----------------------------|------------|------------|-----------------------|

---
